# Supplementary material
Source: PubMed Central journal article supplement (PMC5924674)
Supplement: NIHMS946919-supplement-1.pdf [file NIHMS946919-supplement-1.pdf]

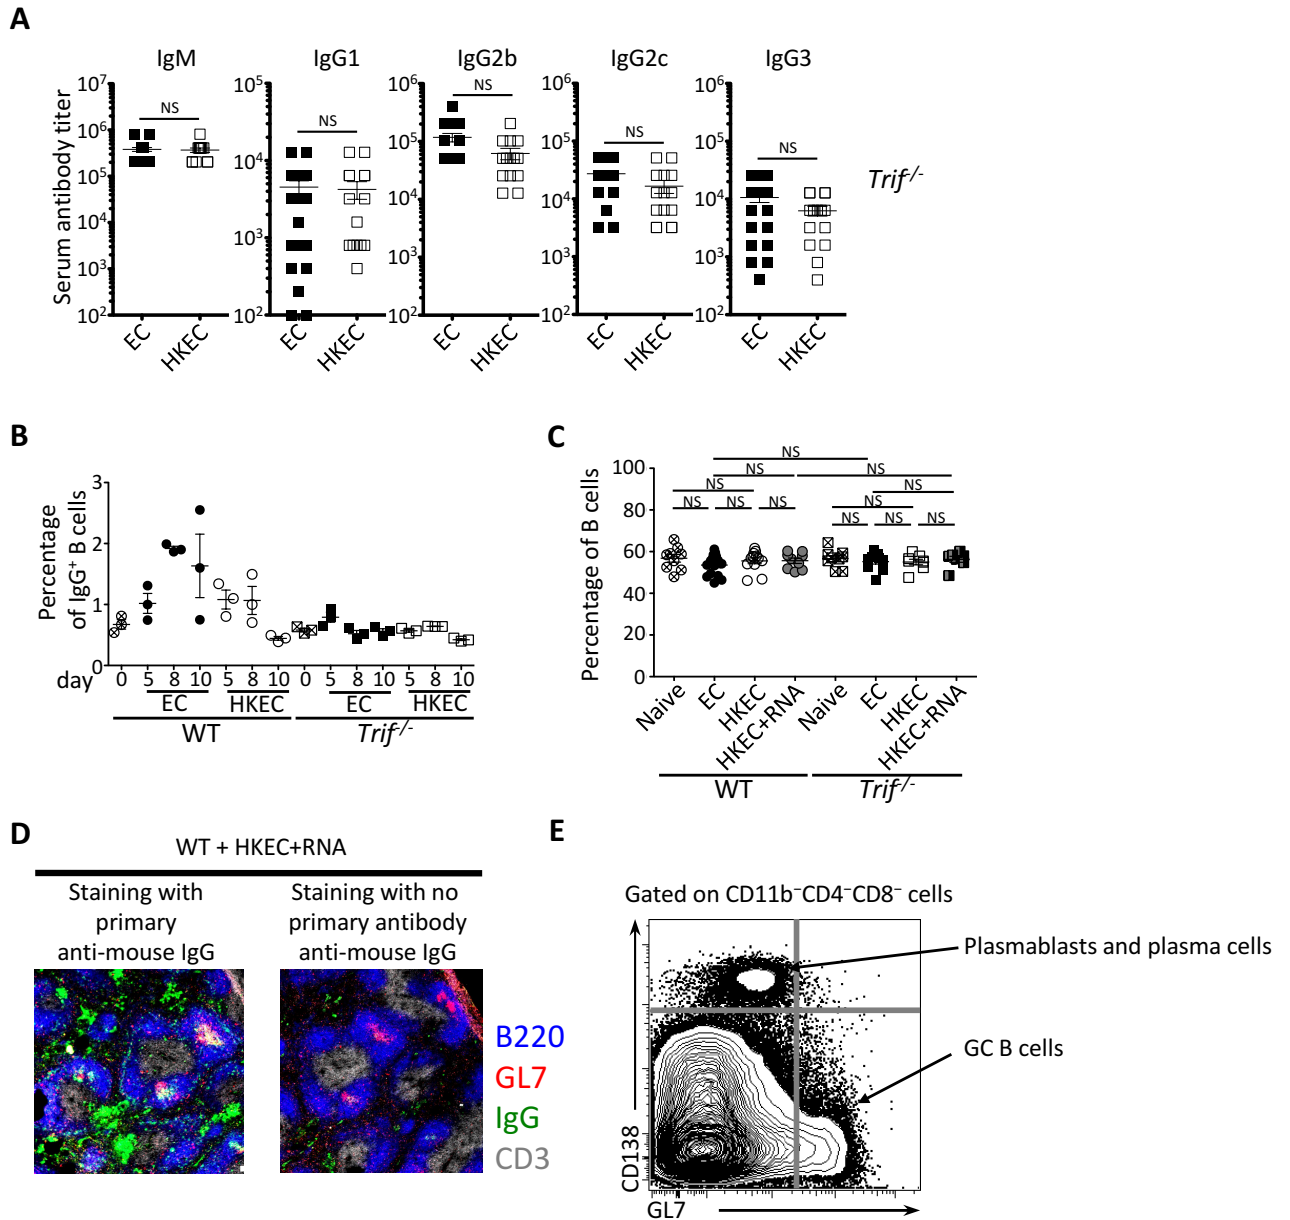

**Figure S1 (related to Figure 1).**

Analysis of total splenic B cell populations.

(A) Day 25 serum titers of class-specific anti-E. coli (EC) antibodies from *Trif*<sup>-/-</sup> mice vaccinated intraperitoneally with 5x10<sup>7</sup> live EC or heat-killed EC (HKEC). (B) Percentage of IgG<sup>+</sup> B cells in the spleens of either naïve WT and *Trif*<sup>-/-</sup> mice (day 0) or at days 5, 8 and 10 post-vaccination of WT and *Trif*<sup>-/-</sup> mice with 5x10<sup>7</sup> live EC or HKEC. (C) Percentage of total B cells in the spleens of naïve WT and *Trif*<sup>-/-</sup> mice or at day 7 post-vaccination with EC, HKEC or HKEC+RNA (30 µg). Each symbol represents an individual mouse. (D) Immunofluorescence micrographs at 4X magnification of spleen sections from WT mice vaccinated with 5x10<sup>7</sup> HKEC+RNA (30 µg) at day 7. Staining was performed in the presence (left panel) or absence (right panel) of primary antibody specific for anti-mouse IgG (IgG1+IgG2a+IgG2b+IgG3). Scale bar = 300 µm. (E) Representative flow cytometry dot-plot showing CD138 and GL7 expression on CD11b<sup>-</sup> and TCRβ<sup>-</sup> splenic cells to exclude myeloid cells and T cells, respectively, from a WT mouse at day 7 post-vaccination with 5x10<sup>7</sup> live EC. NS, not significant (P > 0.05); (two-tailed unpaired *t* test). Data in (A) and (B) are means ± s.e.m.

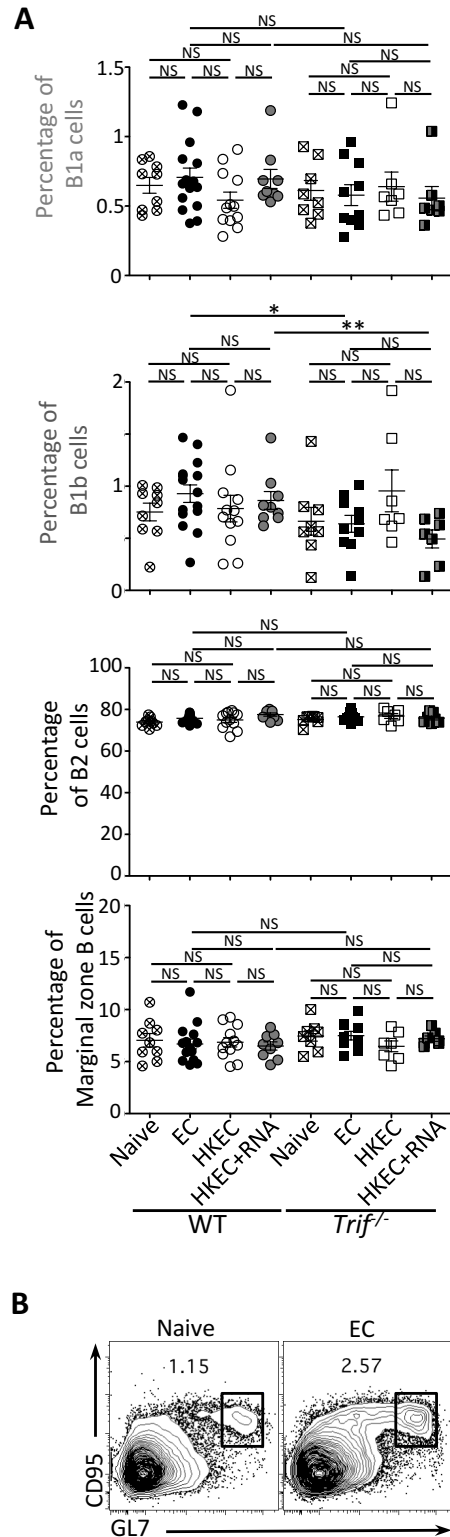

**Figure S2 (related to Figure 2).**

The different subsets of B cells in the spleen and B cell differentiation to GC B cell.

(A) Percentage of total B1a, B1b, B2 or MZ B cell populations in the spleens of WT and *Trif<sup>-/-</sup>* mice 7 days after injection of the vaccines indicated on the X-axis. Each symbol represents an individual mouse. NS, not significant ( $P > 0.05$ ); (two-tailed unpaired *t* test). Data are means  $\pm$  s.e.m. (B) Representative flow cytometry analyses of CD95 and GL7 upregulation on CD19<sup>+</sup> B cells 7 days after vaccination with live *E. coli* (EC). Numbers adjacent to outlined areas indicate percent of cells in gates.

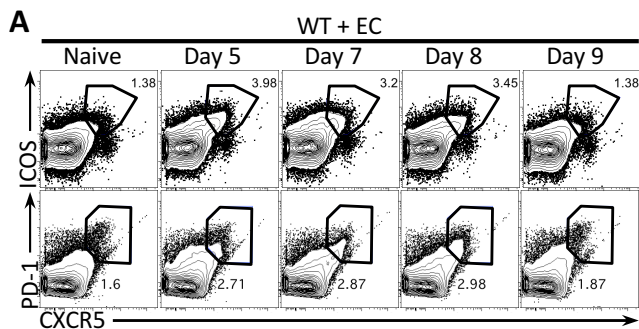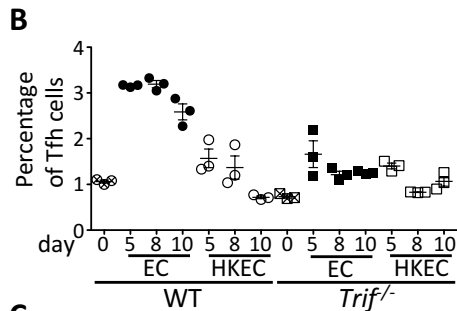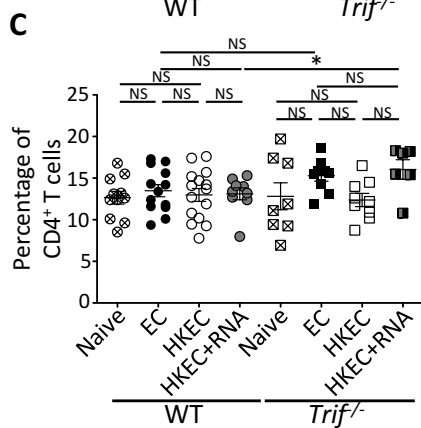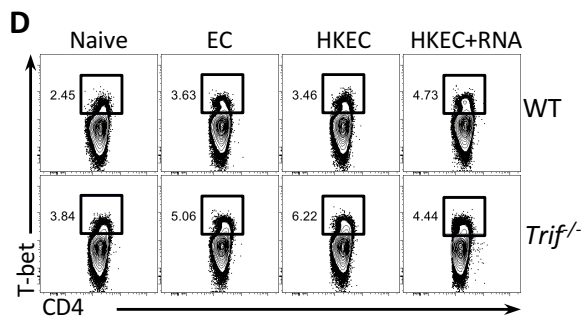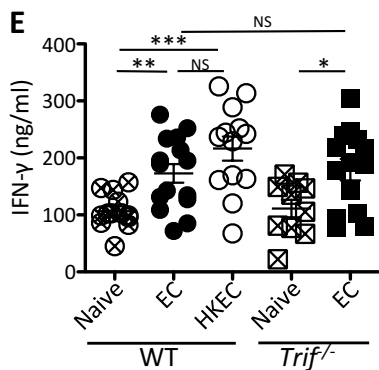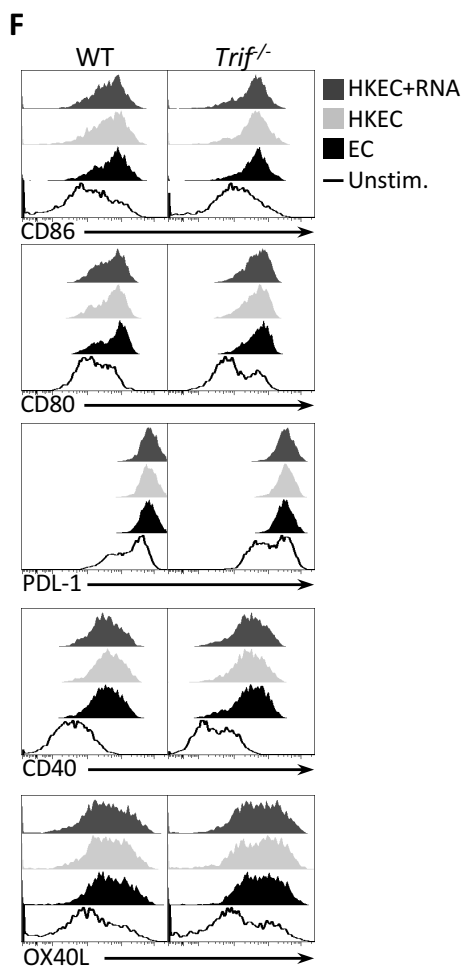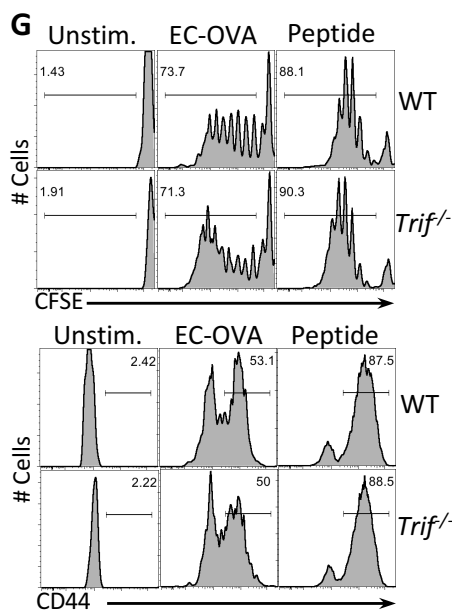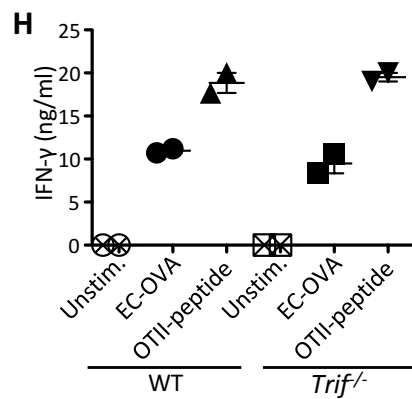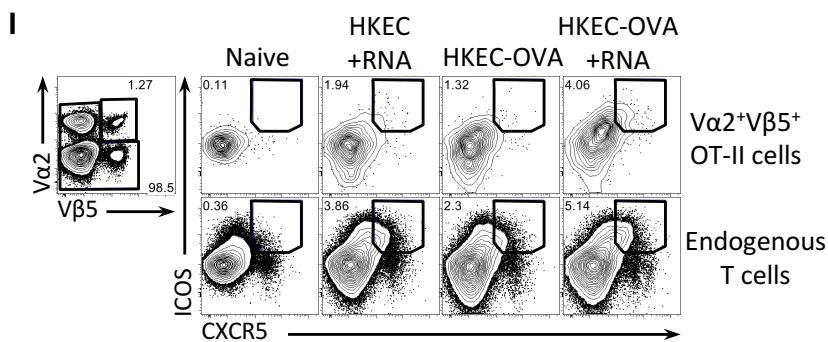

**Figure S3 (related to Figure 3).**

Further characterization of the CD4<sup>+</sup> T cell response after vaccination.

(A) Flow cytometry analyses of CXCR5 and ICOS double-positive cells (gated on CD4<sup>+</sup>CD3<sup>+</sup> cells) and CXCR5 and PD-1 in the spleens of naïve WT mice or at days 5, 7, 8 and 9 post vaccination of WT mice with 5x10<sup>7</sup> live E. coli (EC). (B) Percentage of CXCR5 and ICOS double-positive cells in the spleens of WT and *Trif*<sup>-/-</sup> mice that were either naïve or at days 5, 8 or 10 post vaccination with 5x10<sup>7</sup> live EC, heat-killed E. coli (HKEC) at day 5, 8 or 10. (C) Percentage of CD4<sup>+</sup>CD3<sup>+</sup> cells in the spleens of WT and *Trif*<sup>-/-</sup> mice that were naïve or at 5 days after vaccination. (D) Flow cytometry of T-bet expression in CD4<sup>+</sup> T cells in the spleens of naïve or vaccinated WT and *Trif*<sup>-/-</sup> mice at day 5. (E) Interferon-γ detection by ELISA after two days of re-stimulation on anti-CD3 coated plates of splenic cells from WT mice that had been vaccinated intraperitoneally 7 days earlier with EC or HKEC and *Trif*<sup>-/-</sup> mice that had been vaccinated with EC 7 days earlier. (F) Flow cytometry analyses of the upregulation of co-stimulatory molecules by bone marrow-derived dendritic cells from WT or *Trif*<sup>-/-</sup> mice stimulated or not with live EC, HKEC or HKEC+RNA(30 μg) after 24 hours (bacteria:cell ratio=20). (G) Naïve OT-II CD4<sup>+</sup> T cell proliferation (upper panel) and upregulation of CD44 (lower panel) after 5 days of culture with splenic CD11c<sup>+</sup> cells from WT or *Trif*<sup>-/-</sup> that were either unstimulated or stimulated with live recombinant OVA-expressing E. coli (EC-OVA) at a MOI 20 or with 2μM OT-II control peptide. (H) Detection by ELISA of IFN-γ production by OT-II T cells isolated at day 7 from WT mice that were naïve or vaccinated as in (E) and subjected to re-stimulation on anti-CD3 coated plates for 48 hours. (I) Flow cytometry analyses of the upregulation of surface CXCR5 and ICOS expression by adoptively transferred OT-II T cells (Vα2 and Vβ5 double positive, left panel) or endogenous CD4<sup>+</sup> T cells (double negative or Vα2 or Vβ5 single positive, left panel) in the spleens of naïve WT mice or at day 7 post vaccination of WT mice with HKEC+RNA, HKEC-OVA or HKEC-OVA+RNA(30 μg). NS, not significant ( $P > 0.05$ ); \*,  $P < 0.05$ , \*\*,  $P \leq 0.01$  and \*\*\*,  $P \leq 0.001$  (two-tailed unpaired *t* test). Numbers adjacent to outlined areas indicate percent of cells in gates.

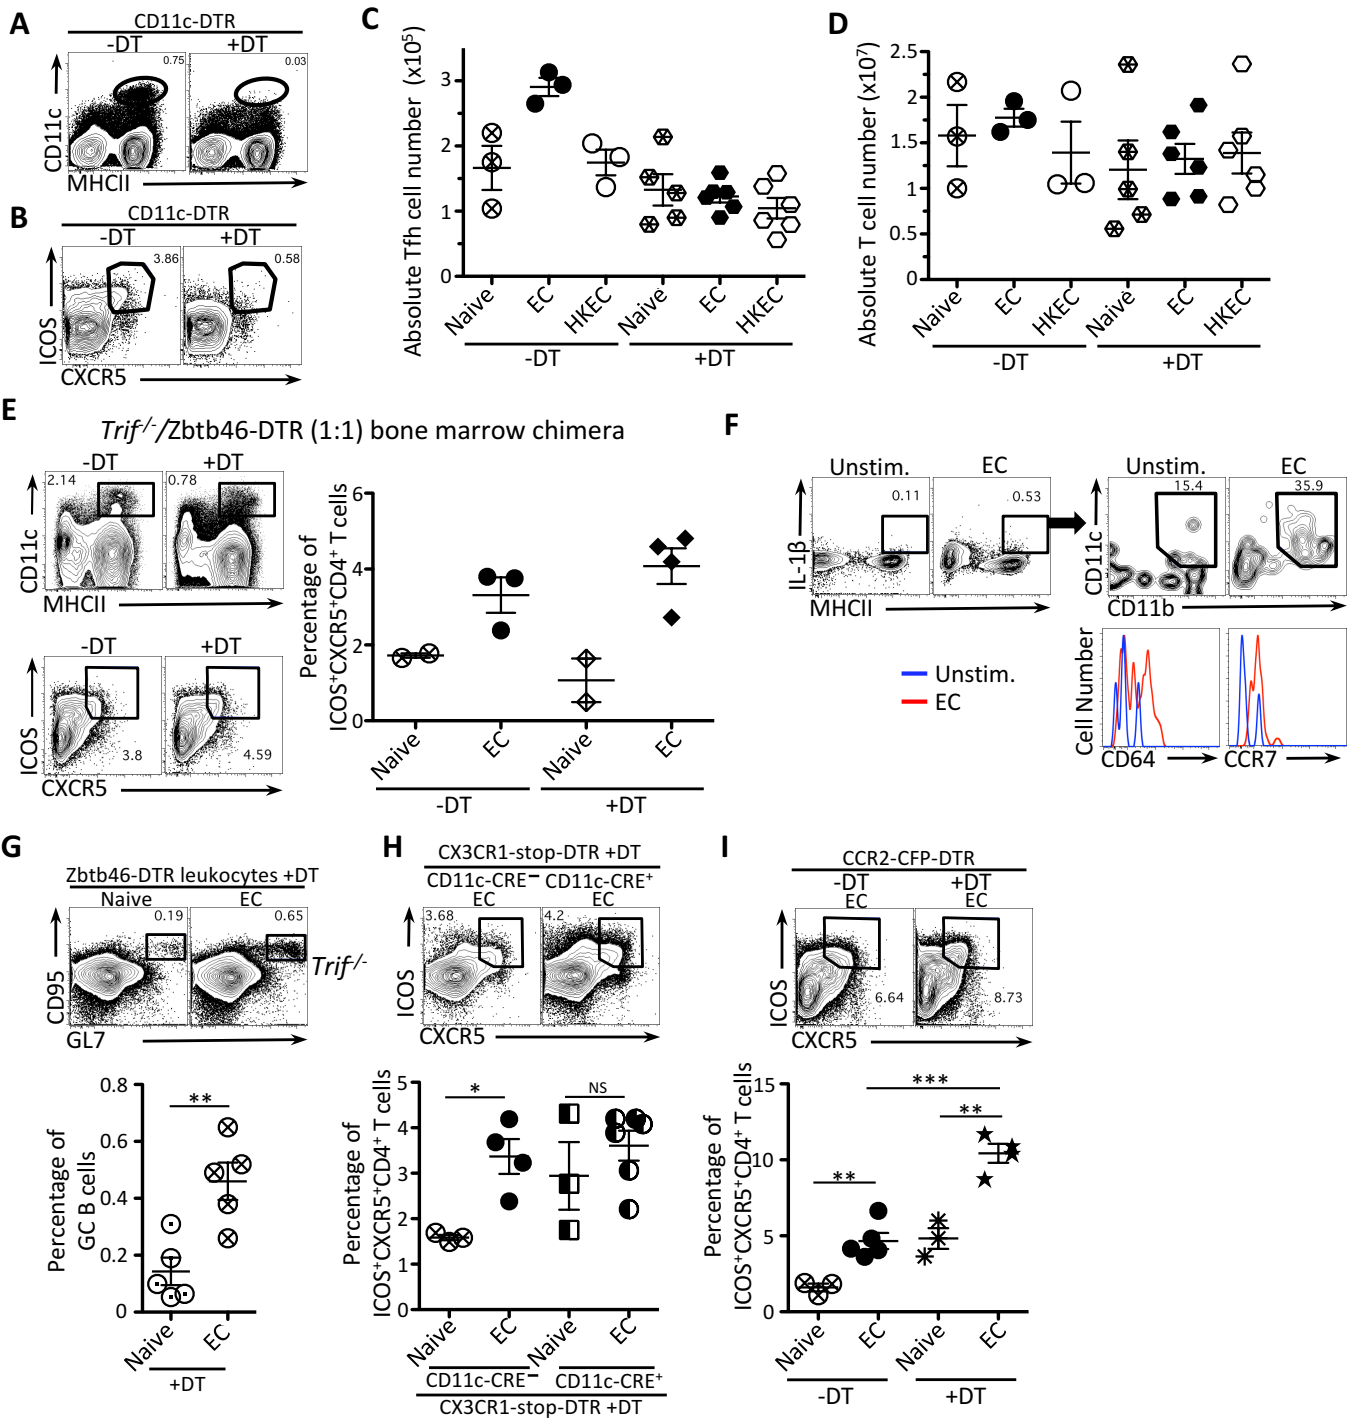

**Figure S4 (related to Figure 4).**

Assessment of the antigen presenting cells driving Tfh cell differentiation.

(A) Flow cytometry analyses of CD11c<sup>+</sup>MHCII<sup>+</sup> dendritic cells in the spleens of naïve chimeric mice that were generated by lethal irradiation of recipient WT mice reconstituted with bone marrow cells from CD11c-DTR mice. Eight weeks after reconstitution, mice were injected with PBS or diphtheria toxin (DT) and DC depletion was assessed 2 days later. (B) Flow cytometry analyses of Tfh cells (gated first on CD4<sup>+</sup>CD3<sup>+</sup> cells followed by gating on double positive ICOS and CXCR5 T cells) in the spleens of CD11c-DTR chimeric mice 5 days after vaccination with live *E. coli* (EC) upon PBS or DT treatment. (C) Absolute numbers of Tfh cells in the spleens of CD11c-DTR chimeric mice 5 days after vaccination with live EC upon PBS or DT treatment (each symbol represents an individual mouse). (D) Absolute numbers of CD4<sup>+</sup>CD3<sup>+</sup> T cells in the spleens of CD11c-DTR chimeric mice 5 days after vaccination with live EC upon after PBS or DT treatment (Each symbol represents an individual mouse). (E) Flow cytometry analyses of CD11c<sup>+</sup>MHC-II<sup>+</sup> dendritic cells in the spleens of naïve chimeric mice that were generated by lethal irradiation of recipient WT mice reconstituted with a mixture of bone marrow cells from Zbtb46-DTR and *Trif*<sup>-/-</sup> mice (ratio 1:1) . 8 weeks after reconstitution, mice were injected with PBS or diphtheria toxin (DT) and classical DC depletion was assessed 2 days later (upper left panel). Flow cytometry analyses of Tfh cells (gated first on CD4<sup>+</sup>CD3<sup>+</sup> cells followed by gating on double positive ICOS and CXCR5 T cells) in the spleens of Zbtb46-DTR/*Trif*<sup>-/-</sup> chimeric mice 5 days after vaccination with live EC upon PBS or DT treatment (lower left panel). Percentage of Tfh cells in the spleens of Zbtb46-DTR/*Trif*<sup>-/-</sup> chimeric mice 5 days after vaccination with live EC upon PBS or DT treatment (each symbol represents an individual mouse, right panel). (F) Flow cytometry analysis of MHC-II<sup>+</sup> cells producing IL-1 $\beta$  (intracellular staining) from *in vitro* culture of leukocytes from Zbtb46-DTR mice stimulated or not for 4hrs with EC in presence of DT and Brefeldin A (Upper left panel). Flow cytometry analysis of IL-1 $\beta$ <sup>+</sup>MHC-II<sup>+</sup> cells based on CD11b and CD11c expression (Upper right panel). Histogram overlay comparing the expression of CD64 and CCR7 comparing stimulated (red) or not (blue) CD11b<sup>+</sup>CD11c<sup>+</sup> cells (lower panel). (G) Flow cytometry analysis (upper panel) and percentage (lower panel) of germinal center B cells obtained *in vivo* 7 days after vaccination with EC of *Trif*<sup>-/-</sup> mice that were adoptively transferred with Zbtb46-DTR leukocytes in the presence DT. (H) Flow cytometry analysis (upper panel) and percentage (lower panel) of ICOS<sup>+</sup>CXCR5<sup>+</sup> Tfh cells in the spleens of CX3CR1-stop-DTR (either CD11c-CRE<sup>-</sup> or CD11c-CRE<sup>+</sup>) 5 days after vaccination with live EC after DT treatment (each symbol represents an individual mouse). (I) Flow cytometry (upper panel) and percentage (lower panel) of Tfh cells in the spleens of CCR2-CFP-DTR mice 5 days after vaccination with live EC upon PBS or DT treatment (each symbol represents an individual mouse).

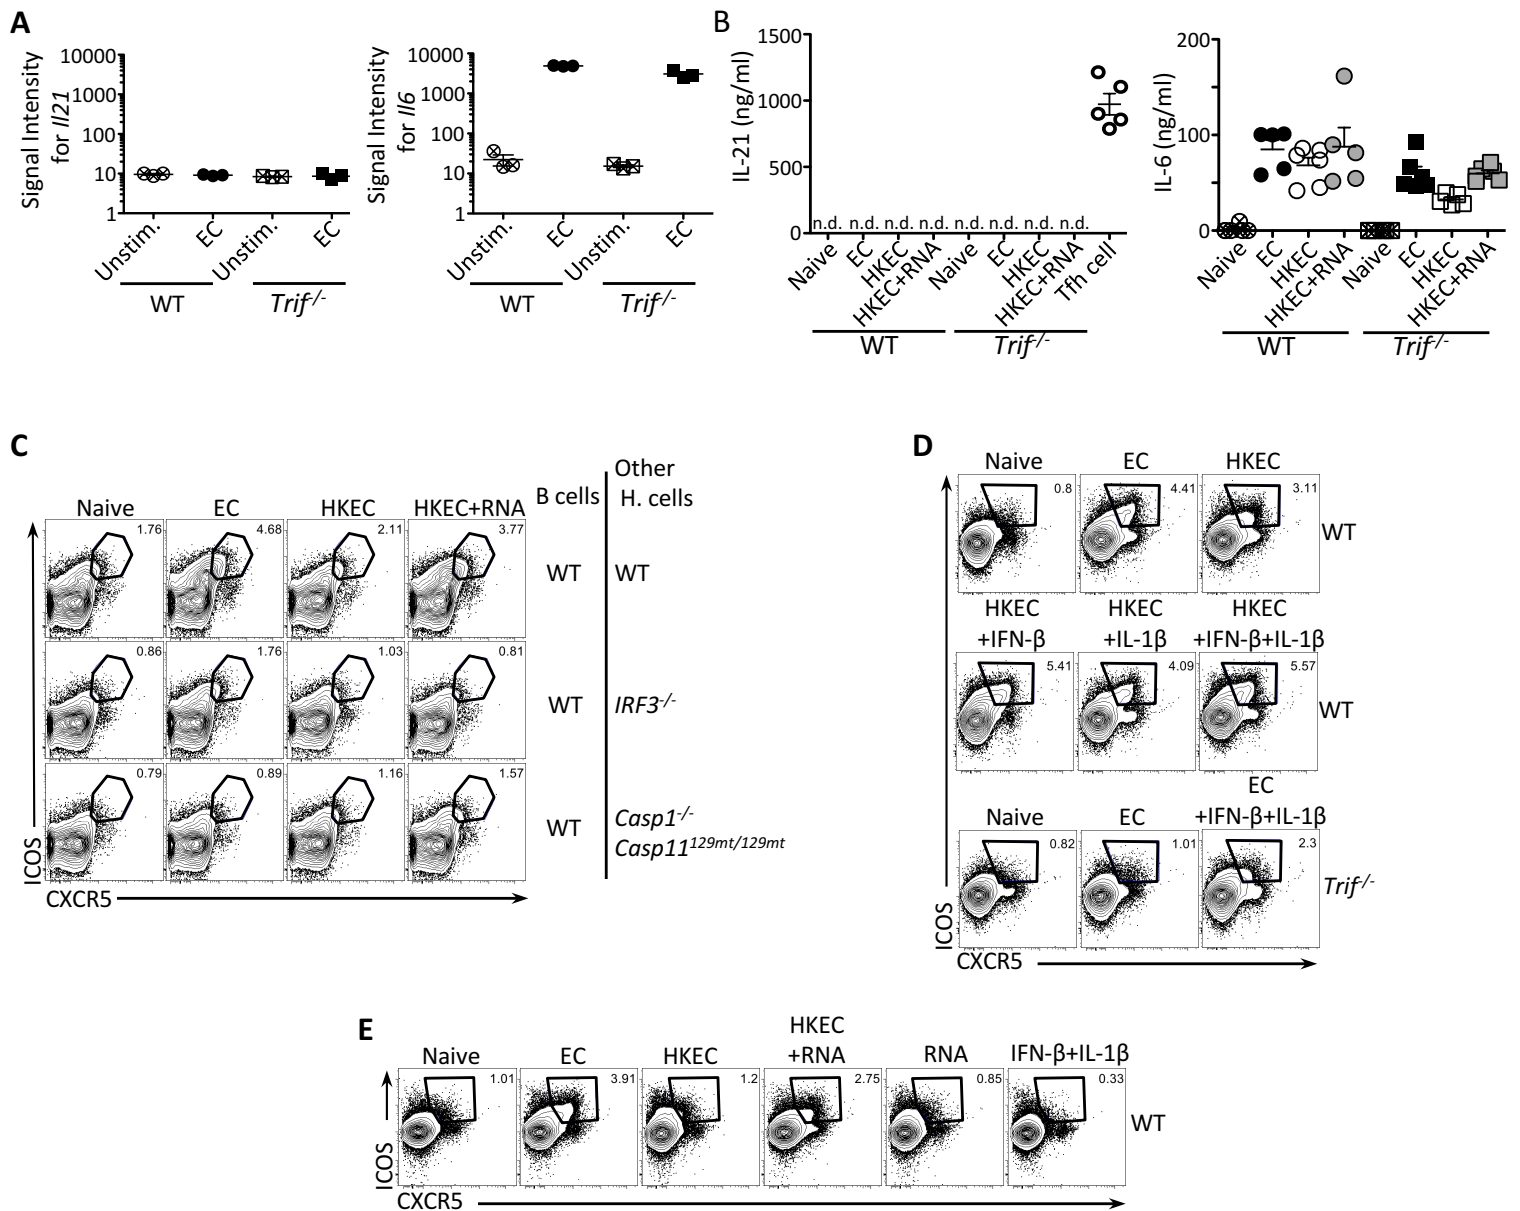

**Figure S5 (related to Figure 5).**

Assessment of cytokines in Tfh cell differentiation.

(A) Gene microarray analyses of WT and *Trif*<sup>-/-</sup> bone marrow macrophages untreated or treated with live *E. coli* for 6 hours (three biological replicates). Data were re-analyzed for *Il-6* and *Il-21* genes from our previous published observation in PMID: 21602824, Sander *et al. Nature* 2011 (Affymetrix Microarray data are available through the NCBI Gene Expression Omnibus (<http://www.ncbi.nlm.nih.gov/geo/>) under accession number [GSE27960](http://www.ncbi.nlm.nih.gov/geo/)). (B) Detection by ELISA of IL-21 and IL-6 in the supernatants of cultured BMDCs from WT or *Trif*<sup>-/-</sup> mice 24 hours after stimulation with live EC, HKEC or HKEC supplemented with 10  $\mu$ g/ml of RNA. The Tfh control condition used was supernatant of sorted CXCR5<sup>+</sup> ICOS<sup>+</sup> CD4 T cells re-stimulated for 2 days on anti-CD3 coated plates. n.d. not detected. (C) Flow cytometry analyses of Tfh cells at day 7 in the spleens of the indicated naive or vaccinated chimeric mice generated similarly to the mice in Figure 4A. Lethally irradiated mice received a mixture of B cell-deficient BM ( $\mu$ MT, 80%) and B cell-sufficient BM (20%). BM from B cell sufficient WT mice were mixed with BM from  $\mu$ MT mice on either WT, *Irf3*<sup>-/-</sup> or *Casp1*<sup>-/-</sup> *Casp11*<sup>129mt/129mt</sup> background. (D) Flow cytometry analyses of ICOS<sup>+</sup> CXCR5<sup>+</sup> CD4<sup>+</sup> Tfh cells in the spleens of WT or *Trif*<sup>-/-</sup> mice vaccinated with  $5 \times 10^7$  live EC, HKEC or HKEC supplemented with intravenous injection of 50U IFN- $\beta$ , 1  $\mu$ g IL-1 $\beta$  or both 20 hours after injection of the bacteria. Each symbol represents an individual mouse. (E) Detection of CXCR5<sup>+</sup> ICOS<sup>+</sup> CD4 T cells in WT mice vaccinated with  $5 \times 10^7$  live EC, HKEC or HKEC supplemented with 30  $\mu$ g of RNA or after a single intraperitoneal injection of 30  $\mu$ g of RNA alone or intravenous injection of 50U IFN- $\beta$  and 1  $\mu$ g IL-1 $\beta$ . Numbers adjacent to outlined areas indicate percent of cells in gates. Numbers adjacent to outlined areas indicate percent of cells in gates. NS, not significant ( $P > 0.05$ ); \*,  $P < 0.05$ ; \*\*,  $P \leq 0.01$  and \*\*\*,  $P \leq 0.001$  (two-tailed unpaired *t* test). Numbers adjacent to outlined areas indicate percent of cells in gates.

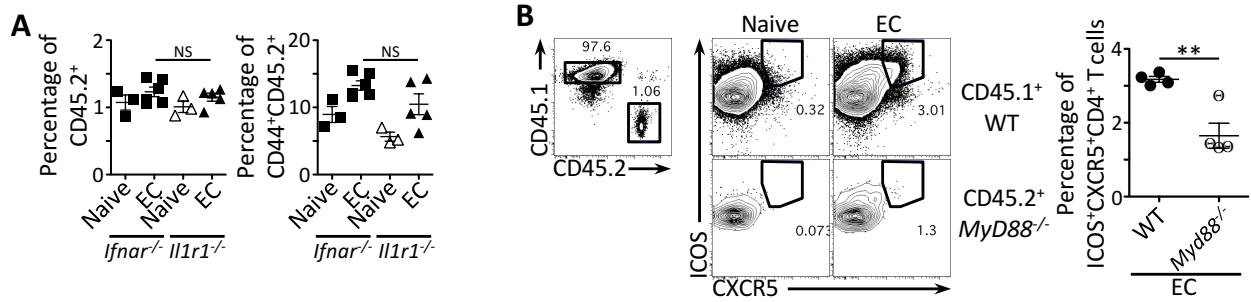

**Figure S6 (related to Figure 6).**

T cell intrinsic effect of IL-1 $\beta$  and IFN- $\beta$  cytokines

(A) Percentage of CD45.2<sup>+</sup>CD4<sup>+</sup> T cells observed in CD45.1 mice that were adoptively transferred with CD45.2<sup>+</sup> *Ifnar*<sup>-/-</sup> or *Il1r1*<sup>-/-</sup> CD4<sup>+</sup> T cells before and after vaccination with live *E. coli* (EC) (left panel). Percentage of activated CD44<sup>+</sup> T cells among the CD45.2<sup>+</sup> *Ifnar*<sup>-/-</sup> or *Il1r1*<sup>-/-</sup> CD4<sup>+</sup> T cells adoptively transferred into CD45.1 mice vaccinated or not with live EC (right panel). (B) Pre-gated on CD4 T cells, detection of adoptively transferred *MyD88*<sup>-/-</sup> CD45.2<sup>+</sup> CD4 T cells (leftmost panel) and Tfh differentiation of endogenous (CD45.1<sup>+</sup>) or adoptively transferred CD4 T cells. NS, not significant ( $P > 0.05$ ); \*,  $P < 0.05$ ; \*\*,  $P \leq 0.01$  and \*\*\*,  $P \leq 0.001$  (two-tailed unpaired  $t$  test). Numbers adjacent to outlined areas indicate percent of cells in gates.



| Mouse Cohort                         | Number (n) | Total B cells   |          |                          | Total B2 cells  |          |                          | Total B1a cells |          |                          | Total B1b cells |          |                          | Total MZ B cells |          |                          |
|--------------------------------------|------------|-----------------|----------|--------------------------|-----------------|----------|--------------------------|-----------------|----------|--------------------------|-----------------|----------|--------------------------|------------------|----------|--------------------------|
|                                      |            | Absolute number | ± s.em.  | Fold increase over naïve | Absolute number | ± s.em.  | Fold increase over naïve | Absolute number | ± s.em.  | Fold increase over naïve | Absolute number | ± s.em.  | Fold increase over naïve | Absolute number  | ± s.em.  | Fold increase over naïve |
| WT Naïve                             | 8          | 6.07E+07        | 1.08E+07 | 1.00                     | 4.39E+07        | 3.07E+06 | 1.00                     | 3.98E+05        | 5.69E+04 | 1.00                     | 4.51E+05        | 7.47E+04 | 1.00                     | 3.89E+06         | 2.01E+05 | 1.00                     |
| WT EC                                | 15         | 6.99E+07        | 2.18E+07 | 1.15                     | 5.32E+07        | 4.21E+06 | 1.21                     | 5.18E+05        | 6.25E+04 | 1.30                     | 6.86E+05        | 1.03E+05 | 1.52                     | 4.64E+06         | 3.86E+05 | 1.19                     |
| WT HKEC                              | 12         | 6.46E+07        | 1.64E+07 | 1.06                     | 4.87E+07        | 4.01E+06 | 1.11                     | 3.24E+05        | 4.56E+04 | 0.81                     | 4.81E+05        | 8.90E+04 | 1.07                     | 4.51E+06         | 4.54E+05 | 1.16                     |
| WT HKEC +RNA                         | 9          | 5.18E+07        | 6.44E+06 | 0.85                     | 4.06E+07        | 1.79E+06 | 0.93                     | 4.37E+05        | 8.22E+04 | 1.10                     | 4.56E+05        | 6.27E+04 | 1.01                     | 3.31E+06         | 1.31E+05 | 0.85                     |
| <i>Trif</i> <sup>-/-</sup> Naïve     | 8          | 5.80E+07        | 1.45E+07 | 1.00                     | 4.37E+07        | 4.09E+06 | 1.00                     | 3.47E+05        | 3.85E+04 | 1.00                     | 4.23E+05        | 1.22E+05 | 1.00                     | 4.31E+06         | 4.52E+05 | 1.00                     |
| <i>Trif</i> <sup>-/-</sup> EC        | 10         | 6.32E+07        | 2.60E+07 | 1.09                     | 4.86E+07        | 6.60E+06 | 1.11                     | 3.64E+05        | 5.56E+04 | 1.05                     | 4.44E+05        | 9.85E+04 | 1.05                     | 4.66E+06         | 6.12E+05 | 1.08                     |
| <i>Trif</i> <sup>-/-</sup> HKEC      | 7          | 6.02E+07        | 1.08E+07 | 1.04                     | 4.63E+07        | 3.25E+06 | 1.06                     | 3.86E+05        | 6.40E+04 | 1.11                     | 5.97E+05        | 1.54E+05 | 1.41                     | 3.68E+06         | 3.95E+05 | 0.85                     |
| <i>Trif</i> <sup>-/-</sup> HKEC +RNA | 7          | 4.84E+07        | 9.50E+06 | 0.83                     | 3.58E+07        | 2.18E+06 | 0.82                     | 2.76E+05        | 5.21E+04 | 0.80                     | 2.47E+05        | 5.55E+04 | 0.58                     | 3.95E+06         | 2.76E+05 | 0.92                     |

**Supplementary Table 1 (Related to Figure 2)**

Cell counts of total splenic B cell populations before or 7 days after the indicated vaccination.

| Mouse Cohort                        | Number (n) | Total IgG <sup>+</sup> B cells |          |                          | IgG <sup>+</sup> B2 cells |          |                          | IgG <sup>+</sup> B1a cells |          |                          | IgG <sup>+</sup> B1b cells |          |                          | IgG <sup>+</sup> MZ B cells |          |                          |
|-------------------------------------|------------|--------------------------------|----------|--------------------------|---------------------------|----------|--------------------------|----------------------------|----------|--------------------------|----------------------------|----------|--------------------------|-----------------------------|----------|--------------------------|
|                                     |            | Absolute number                | ± s.em.  | Fold increase over naïve | Absolute number           | ± s.em.  | Fold increase over naïve | Absolute number            | ± s.em.  | Fold increase over naïve | Absolute number            | ± s.em.  | Fold increase over naïve | Absolute number             | ± s.em.  | Fold increase over naïve |
| WT Naïve                            | 8          | 5.56E+05                       | 8.99E+04 | 1.00                     | 2.12E+05                  | 4.44E+04 | 1.00                     | 9.01E+03                   | 2.00E+03 | 1.00                     | 1.63E+04                   | 4.18E+03 | 1.00                     | 1.28E+04                    | 1.94E+03 | 1.00                     |
| WT EC                               | 15         | 1.61E+06                       | 1.75E+05 | 2.89                     | 5.43E+05                  | 8.54E+04 | 2.57                     | 3.91E+04                   | 7.58E+03 | 4.35                     | 8.47E+04                   | 2.12E+04 | 5.20                     | 3.46E+04                    | 4.14E+03 | 2.71                     |
| WT HKEC                             | 12         | 9.92E+05                       | 1.21E+05 | 1.79                     | 3.18E+05                  | 4.06E+04 | 1.50                     | 1.83E+04                   | 3.79E+03 | 2.03                     | 4.11E+04                   | 1.10E+04 | 2.53                     | 1.87E+04                    | 1.16E+03 | 1.47                     |
| WT HKEC+RNA                         | 9          | 1.24E+06                       | 1.40E+05 | 2.23                     | 6.12E+05                  | 2.60E+04 | 2.89                     | 3.72E+04                   | 7.81E+03 | 4.13                     | 7.75E+04                   | 2.54E+04 | 4.76                     | 4.86E+04                    | 8.95E+03 | 3.80                     |
| <i>Trif</i> <sup>-/-</sup> Naïve    | 8          | 7.13E+05                       | 1.08E+05 | 1.00                     | 2.82E+05                  | 4.18E+04 | 1.00                     | 1.36E+04                   | 1.68E+03 | 1.00                     | 2.18E+04                   | 5.96E+03 | 1.00                     | 2.09E+04                    | 5.01E+03 | 1.00                     |
| <i>Trif</i> <sup>-/-</sup> EC       | 10         | 7.87E+05                       | 1.01E+05 | 1.10                     | 3.21E+05                  | 4.23E+04 | 1.14                     | 1.87E+04                   | 3.97E+03 | 1.37                     | 2.77E+04                   | 7.39E+03 | 1.27                     | 2.84E+04                    | 5.47E+03 | 1.36                     |
| <i>Trif</i> <sup>-/-</sup> HKEC     | 7          | 6.84E+05                       | 8.18E+04 | 0.96                     | 2.93E+05                  | 2.68E+04 | 1.04                     | 1.41E+04                   | 2.30E+03 | 1.04                     | 2.56E+04                   | 7.63E+03 | 1.17                     | 1.89E+04                    | 3.11E+03 | 0.90                     |
| <i>Trif</i> <sup>-/-</sup> HKEC+RNA | 7          | 6.53E+05                       | 7.76E+04 | 0.92                     | 2.28E+05                  | 3.12E+04 | 0.81                     | 1.38E+04                   | 2.86E+03 | 1.02                     | 1.39E+04                   | 7.28E+03 | 0.64                     | 2.67E+04                    | 6.10E+03 | 1.28                     |

**Supplementary Table 2 (Related to Figure 2)**

Cell counts of IgG class-switched splenic B cells for each subset before or 7 days after the indicated vaccination.
